# Supplementary material for: Identification of molecular subtypes and a novel prognostic model of diffuse large B-cell lymphoma based on a metabolism-associated gene signature
Source: Springer Nature journal article supplement (doi:10.1186/s12967-022-03393-9), 2022-04-25
Supplement: MOESM1 [file 20341924]

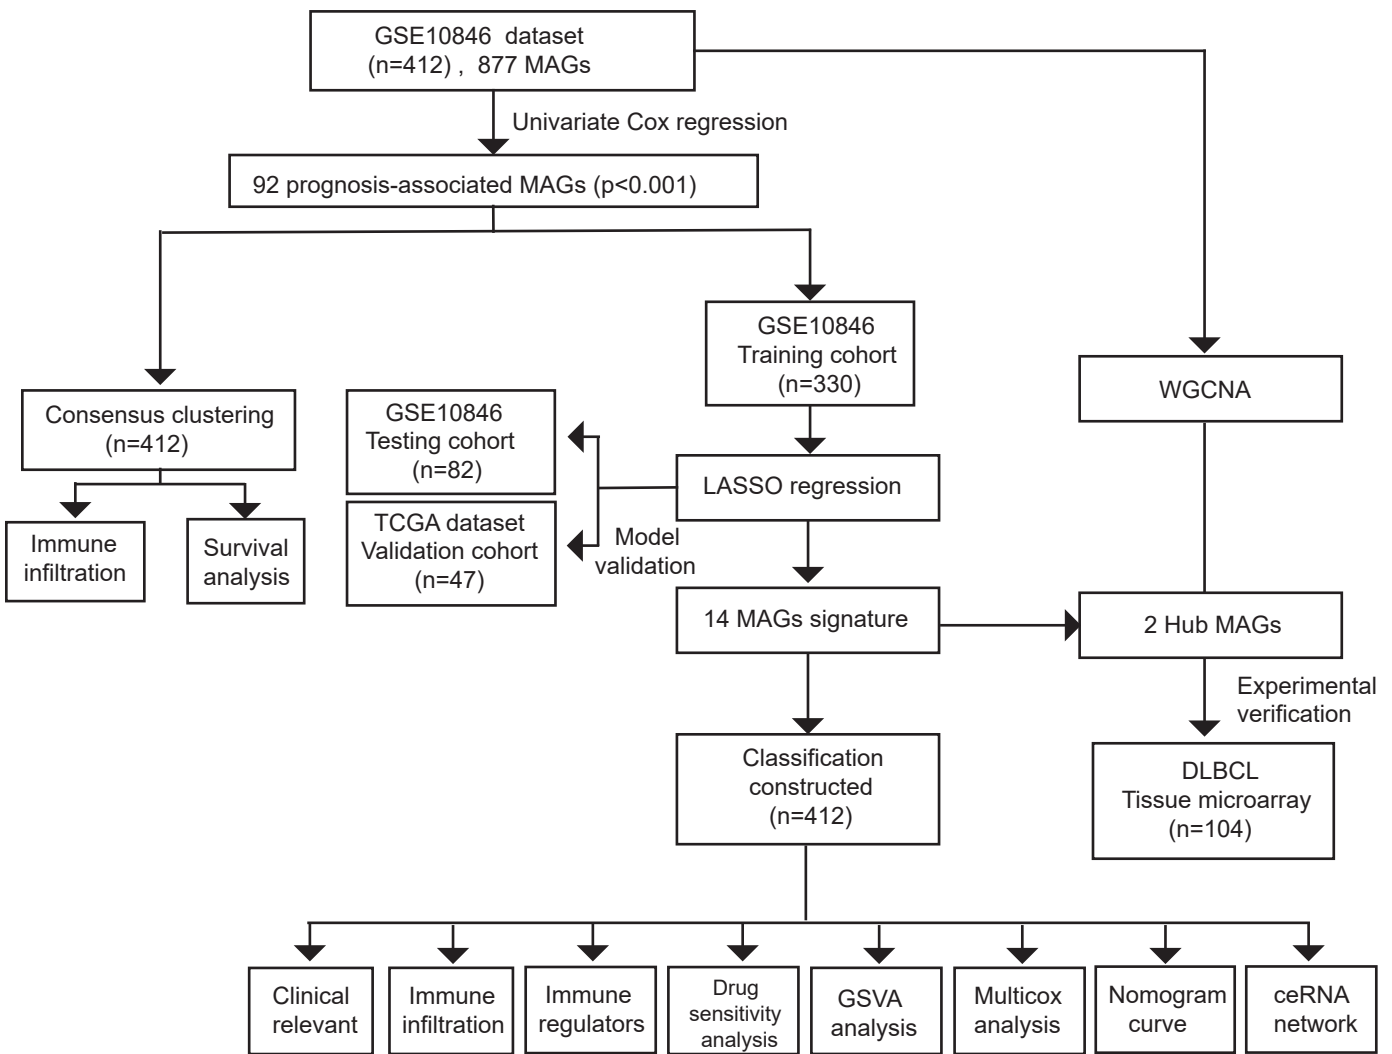

**Additional file 1: Figure S1.** Flow chart of the data analyzing process. The GSE10846 dataset was randomly divided (4:1 ratio) into a training cohort (n=330) and a testing cohort (n=82).
