# Supplementary material for: Identification of molecular subtypes and a novel prognostic model of diffuse large B-cell lymphoma based on a metabolism-associated gene signature
Source: Springer Nature journal article supplement (doi:10.1186/s12967-022-03393-9), 2022-04-25
Supplement: MOESM2 [file 20341924]

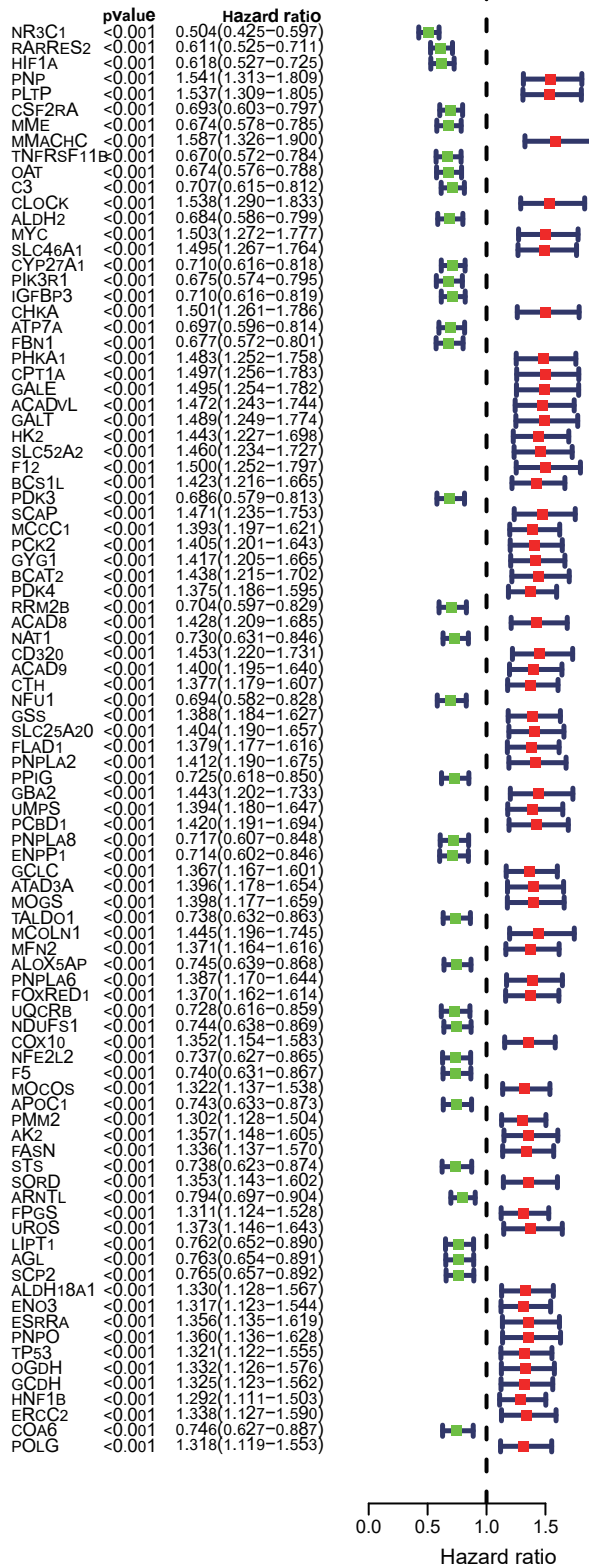

Additional file 2: Figure S2. 92 Prognosis-related MAGs by univariate Cox regression.
