# Supplementary material for: Identification of molecular subtypes and a novel prognostic model of diffuse large B-cell lymphoma based on a metabolism-associated gene signature
Source: Springer Nature journal article supplement (doi:10.1186/s12967-022-03393-9), 2022-04-25
Supplement: MOESM4 [file 20341924]

**A**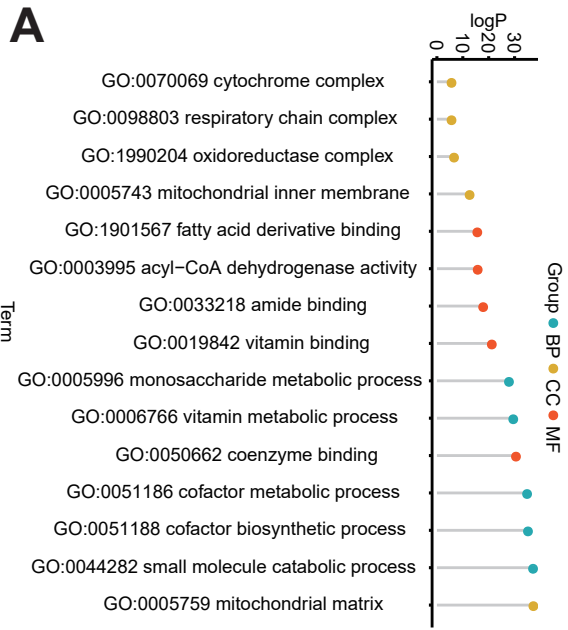**C**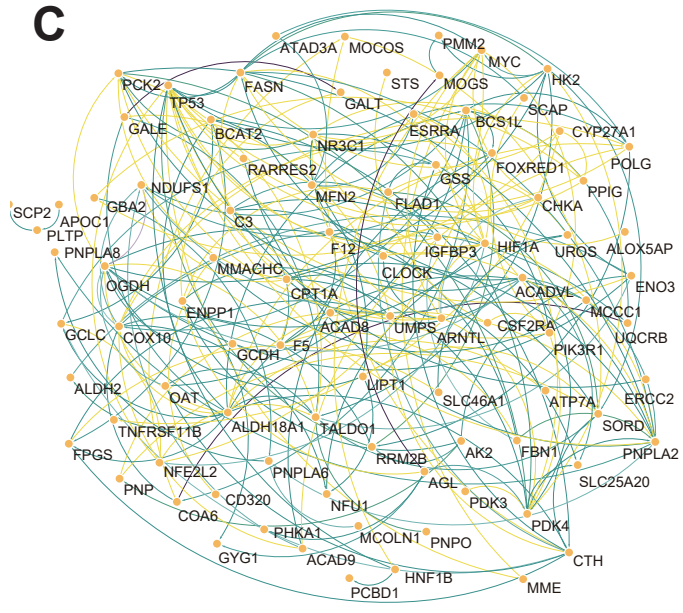**B**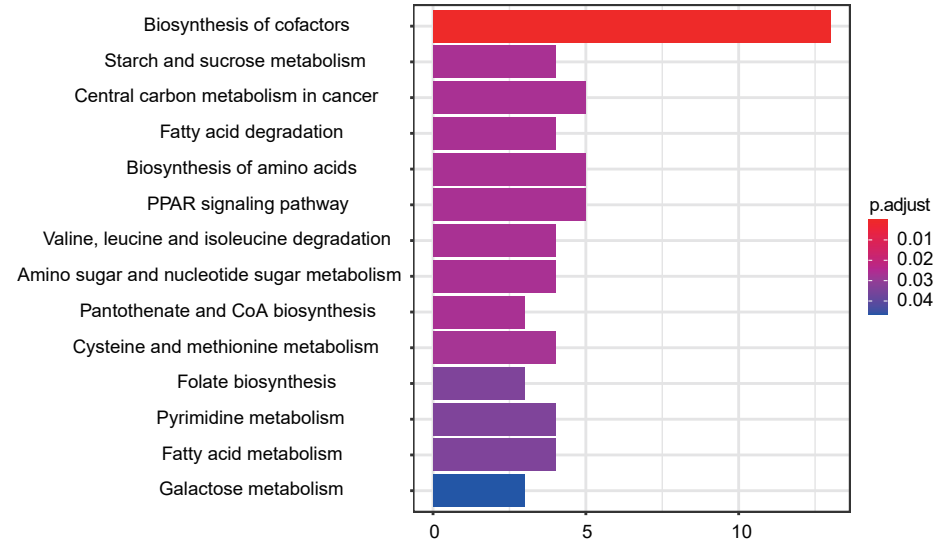

**Additional file 4: Figure S4.** Functional analyses based on 92 prognostic MAGs. **(A)** Lollipop Chart for GO enrichment (BP, biological process; CC, cellular component; MF, molecular function). **(B)** Barplot graph for KEGG pathways. **(C)** PPI analysis showing the protein interaction network of MAGs.
