# Supplementary material for: Identification of molecular subtypes and a novel prognostic model of diffuse large B-cell lymphoma based on a metabolism-associated gene signature
Source: Springer Nature journal article supplement (doi:10.1186/s12967-022-03393-9), 2022-04-25
Supplement: MOESM5 [file 20341924]

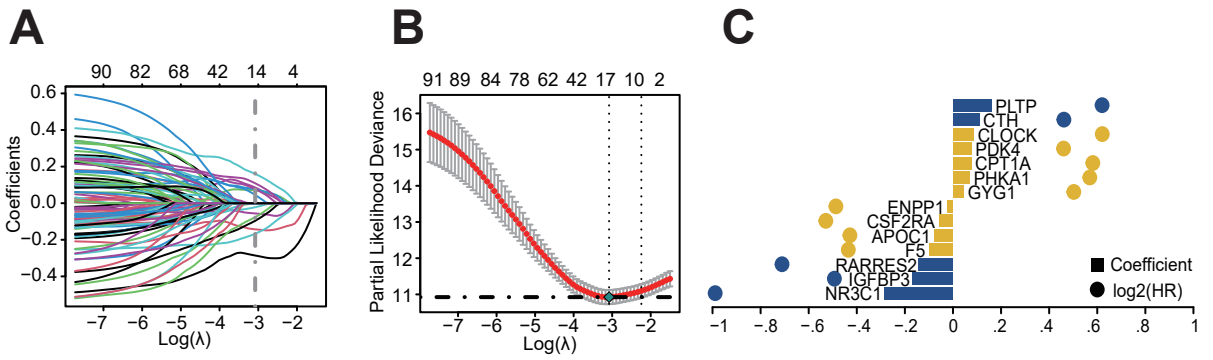

**Additional file 5: Figure S5.** LASSO regression analysis revealing the minimum criteria (**A, B**) and coefficients (**C**). Blue represented the coefficient greater than 0.1, and yellow represented the coefficient less than 0.1.
