# Supplementary material for: Identification of molecular subtypes and a novel prognostic model of diffuse large B-cell lymphoma based on a metabolism-associated gene signature
Source: Springer Nature journal article supplement (doi:10.1186/s12967-022-03393-9), 2022-04-25
Supplement: MOESM6 [file 20341924]

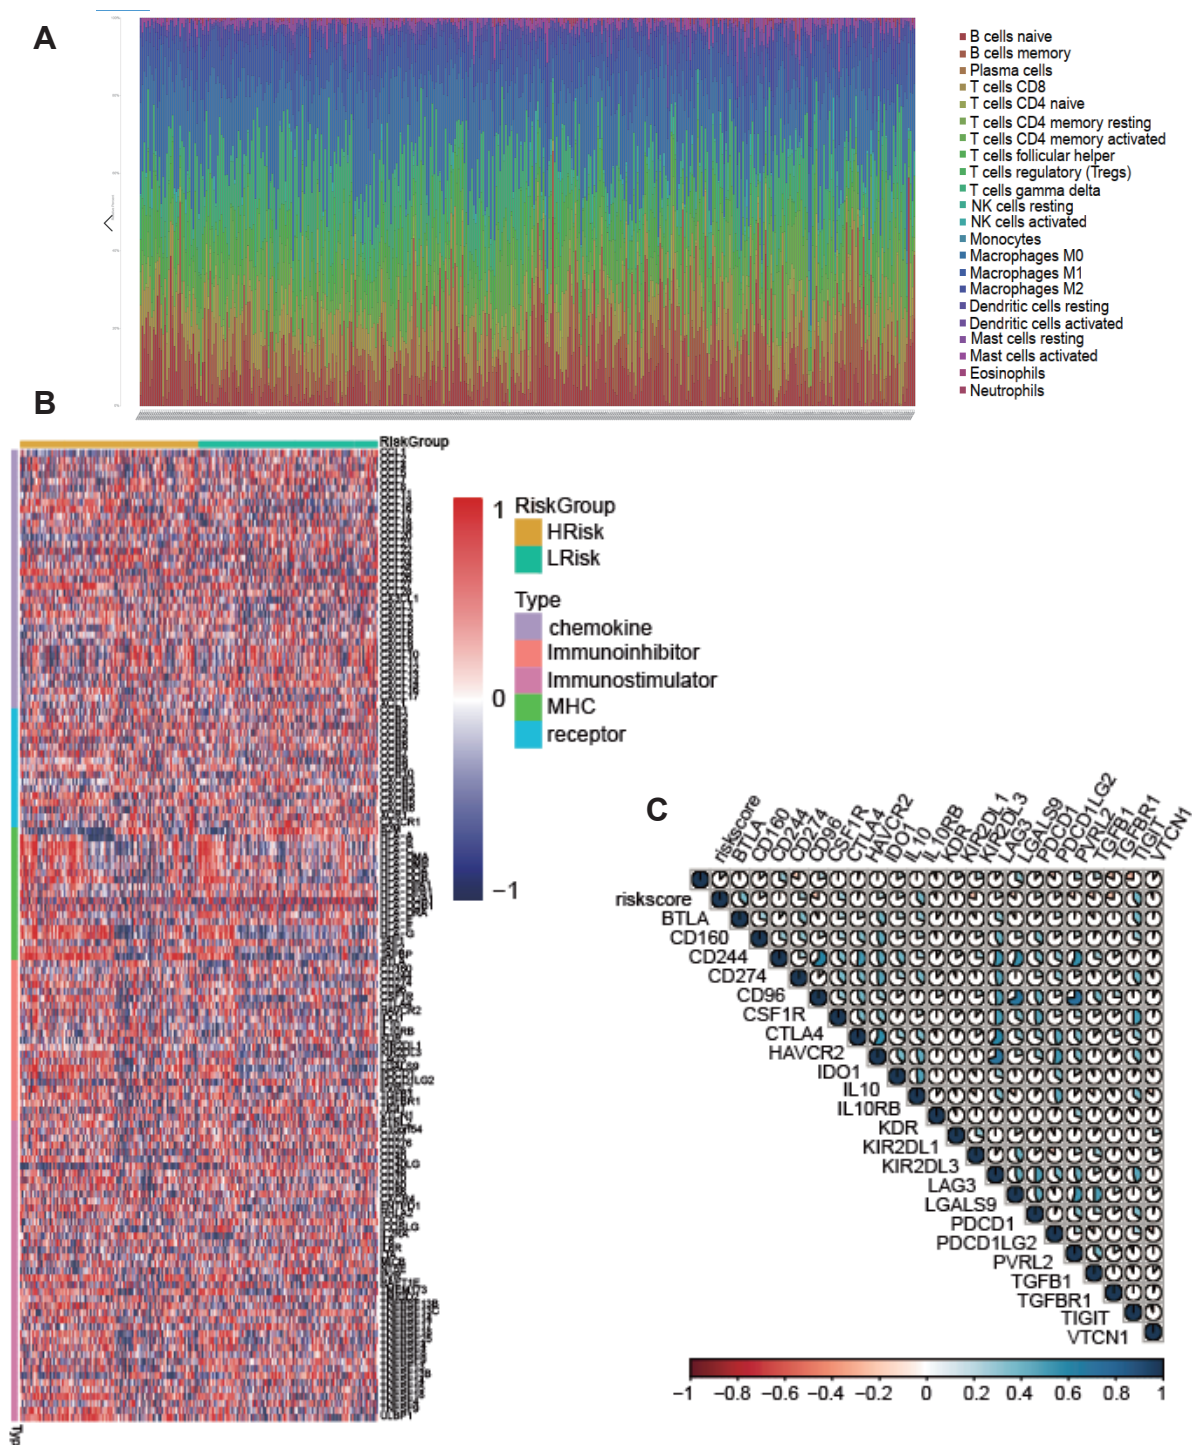

**Additional file 6: Figure S6.** The heatmaps of immune cells and immune-regulatory genes expression in the high- and low-risk group. **(A)** The proportion of 22 types of immune cells in the training cohort patients. **(B)** Immune-regulatory genes expression in the high- and low-risk group. **(C)** Correlation between the risk score and immune checkpoints. p values were showed as: ns not significant; \*p < 0.05; \*\*p < 0.01; \*\*\*p < 0.001.
