# Supplementary material for: Identification of molecular subtypes and a novel prognostic model of diffuse large B-cell lymphoma based on a metabolism-associated gene signature
Source: Springer Nature journal article supplement (doi:10.1186/s12967-022-03393-9), 2022-04-25
Supplement: MOESM7 [file 20341924]

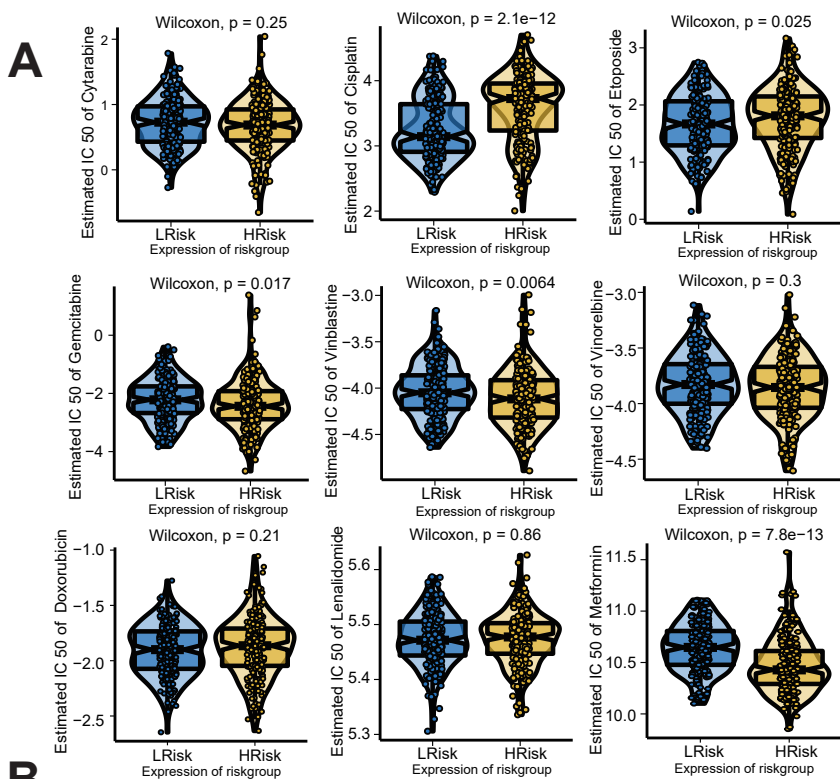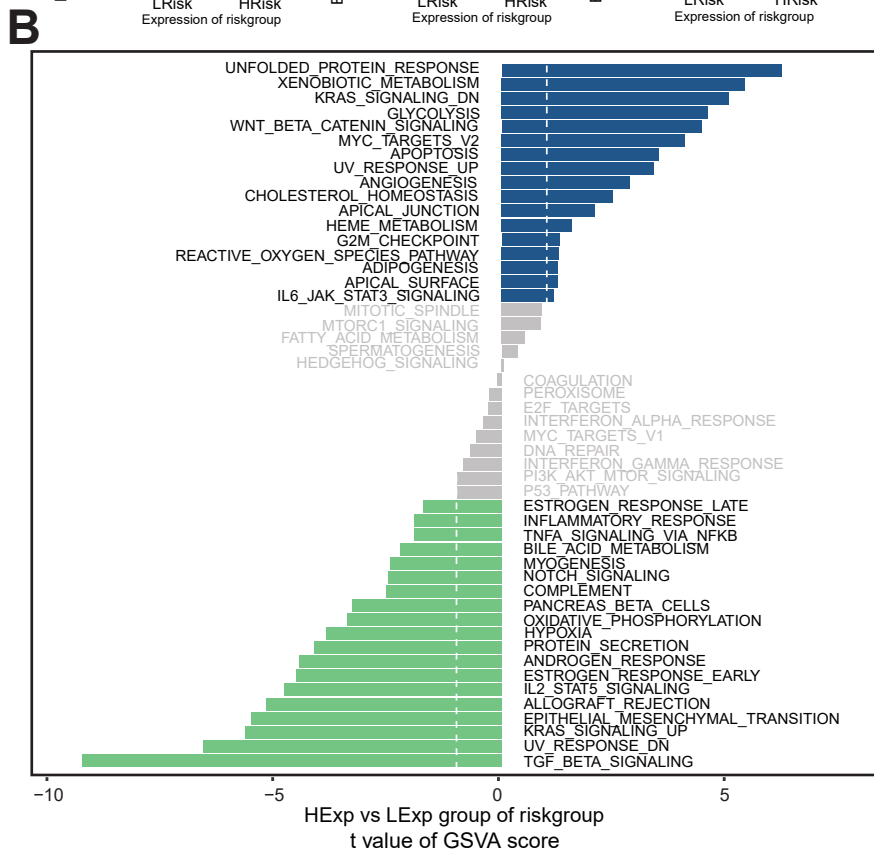

**Additional file 7: Figure S7.** Prediction of drug sensitivity and signaling pathways in high- and low-risk groups. **(A)** Sensitivity analysis of common therapeutic drugs in patients of two groups. **(B)** GSVA analysis for differentially expressed signaling pathways between two groups.
