# Supplementary material for: Identification of molecular subtypes and a novel prognostic model of diffuse large B-cell lymphoma based on a metabolism-associated gene signature
Source: Springer Nature journal article supplement (doi:10.1186/s12967-022-03393-9), 2022-04-25
Supplement: MOESM8 [file 20341924]

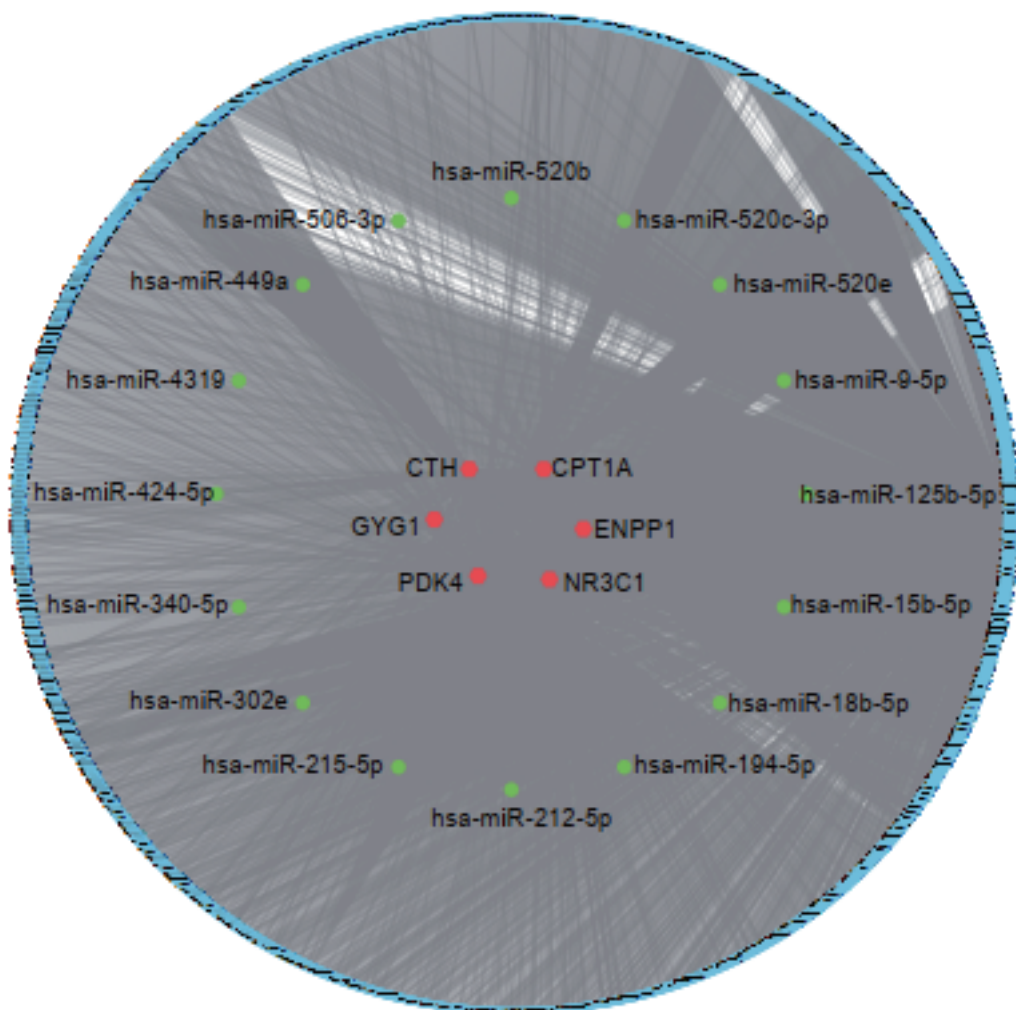

**Additional file 8: Figure S8.** The ceRNA network associated with the model genes. The red dots represent mRNAs, the green dots represent miRNAs and the blue dots represent lncRNAs.
