# Supplementary material for: Identification of molecular subtypes and a novel prognostic model of diffuse large B-cell lymphoma based on a metabolism-associated gene signature
Source: Springer Nature journal article supplement (doi:10.1186/s12967-022-03393-9), 2022-04-25
Supplement: MOESM10 [file 20341924]

**A****Univariate Analysis**

pvalue Hazard ratio

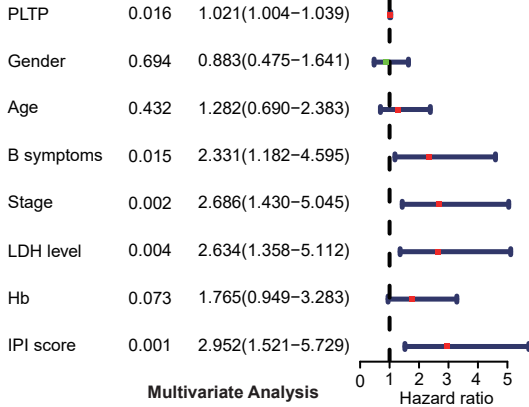**Multivariate Analysis**

pvalue Hazard ratio

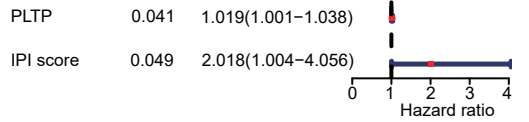**B****Univariate Analysis**

pvalue Hazard ratio

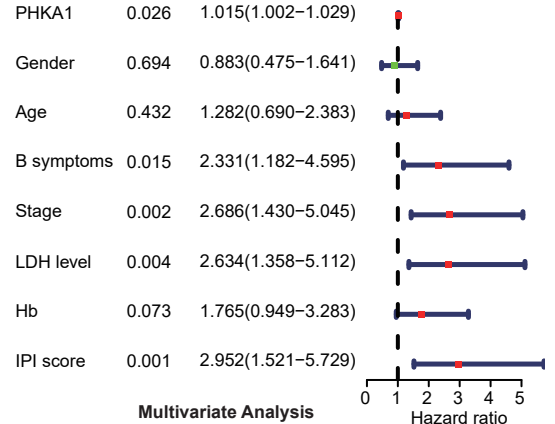**Multivariate Analysis**

pvalue Hazard ratio

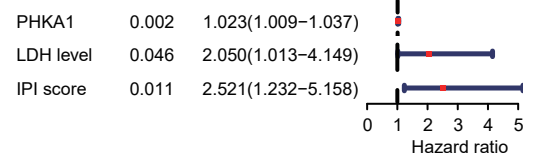

**Additional file 10: Figure S10.** Cox univariate and multivariate regression analysis revealed that PLTP (**A**) and PHKA1 (**B**) were both independent prognostic factors for DLBCL patients.
